# Supplementary material
Source: PubMed Central journal article supplement (PMC2823380)
Supplement: 97320630004053S1.pdf [file 97320630004053S1.pdf]

## Supplementary material:

**Table 1:** Antibacterial activity profile of M4 performed by agar well method was observed in terms of zone of inhibition (zoi) shown by 100µl of fermented broth.

| Bacterial Test Strains                   | Zoi (mm) |
|------------------------------------------|----------|
| <i>Bacillus subtilis</i> ATCC 6633       | 38       |
| <i>Bacillus subtilis</i> NCTC 8236       | 29       |
| <i>Bacillus coagulans</i> MTCC 2302      | 35       |
| <i>Staphylococcus aureus</i> ATCC 6538   | 35       |
| <i>Staphylococcus aureus</i> MTCC 96     | 35       |
| <i>Escherichia coli</i> MTCC 64          | 30       |
| <i>Escherichia coli</i> MTCC 739         | NA*      |
| <i>Escherichia coli</i> ATCC 1303        | 26       |
| <i>Escherichia coli</i> ATCC 1304        | 30       |
| <i>Pseudomonas aeruginosa</i> MTCC 424   | NA*      |
| <i>Kleibsellla pneumoniae</i> ATCC 13883 | NA*      |
| <i>Salmonella typhi</i> S-5731/64        | 28       |
| <i>Proteus vulgaris</i> ATCC 6380        | 39       |
| <i>Micrococcus flavus</i> ATCC 10240     | 28       |

NA\*: Not Active

**Table 2:** Antifungal activity profile of M4 performed by agar disc method was observed in terms of zone of inhibition (zoi) shown by 100µl of fermented broth.

| Fungal Test Strains                      | Zoi (mm) |
|------------------------------------------|----------|
| <i>Candida albicans</i> ATCC 24433       | 24       |
| <i>Candida albicans</i> MTCC 1346        | 28       |
| <i>Candida albicans</i> MTCC 2512        | 30       |
| <i>Candida. albicans</i> CDRI 1          | 26       |
| <i>Candida albicans</i> MTCC 183         | 23       |
| <i>Candida tropicalis</i> MTCC 184       | 22       |
| <i>Saccharomyces cerevisiae</i> MTCC 307 | 25       |
| <i>Rhizoctonia oryzae</i> MTCC2162       | NA*      |
| <i>Cryptococcus terreus</i> MTCC 1716    | 23       |
| <i>Beauveria nivea</i> MTCC 557          | 18       |
| <i>Alternaria alternata</i> MTCC 1362    | 18       |
| <i>Trichophyton rubrum</i> MTCC 296      | 28       |
| <i>Fusarium moniliforme</i> MTCC 156     | NA*      |
| <i>Penicillium ochrochloron</i> MTCC 517 | 22       |

NA\*: Not Active
